# Supplementary material
Source: publisher site journal article supplement (https://www.dovepress.com/article/372464)
Supplement: Supplementary file 1 [file get_supplementary_file.php]

## Appendix Search strategy

### PubMed query

(Physicians[Mesh] OR Doctor[tiab] OR Doctors[tiab] OR Physician[tiab] OR Physicians[tiab] OR Clinician[tiab] OR Clinicians[tiab] OR "General practitioner"[tiab] OR "General practitioners"[tiab] OR Cardiologist[tiab] OR Cardiologists[tiab] OR Dermatologist[tiab] OR Dermatologists[tiab] OR Endocrinologist[tiab] OR Endocrinologists[tiab] OR Gastroenterologist[tiab] OR Gastroenterologists[tiab] OR Geriatrician[tiab] OR Geriatricians[tiab] OR Neurologist[tiab] OR Neurologists[tiab] OR Oncologist[tiab] OR Oncologists[tiab] OR Obstetrician[tiab] OR Obstetricians[tiab] OR Pediatrician[tiab] OR Pediatricians[tiab] OR Paediatrician[tiab] OR Paediatricians[tiab] OR Psychiatrist[tiab] OR Psychiatrists[tiab] OR "Family Physician"[tiab] OR "Family Physicians"[tiab] OR Surgeon[tiab] OR Surgeons[tiab] OR Urologist[tiab] OR Urologists[tiab] OR Psychiatrist[tiab] OR Psychiatrists[tiab] OR Resident[tiab] OR Residents[tiab] OR Registrar[tiab] OR Registrars[tiab] OR Consultant[tiab] OR Consultants[tiab] OR Specialist[tiab] OR Specialists[tiab])

AND

("Practice Patterns, Physicians"[Mesh] OR "Clinical Competence"[Mesh] OR Individual[tiab] OR Individuals[tiab])

AND

(Variability[tiab] OR Variation[tiab] OR Vary[tiab])

AND

("Outcome and Process Assessment, Health Care"[Mesh] OR "Quality of Health Care"[Mesh] OR "Patient Care"[Mesh] OR "Patient care"[tiab] OR "Care quality"[tiab] OR ((Treatment[tiab] OR Medical[tiab] OR Surgical[tiab]) AND (Outcome[tiab] OR Outcomes[tiab])))

AND

("Epidemiologic Studies"[Mesh] OR "case-control studies"[Mesh] OR "Cohort Studies"[Mesh] OR "Case control"[tiab] OR Longitudinal[tiab] OR Prospective[tiab] OR Retrospective[tiab] OR "Cross sectional"[tiab] OR "Cross-Sectional Studies"[Mesh] OR Investigated[tiab] OR Analysis[tiab] OR Data[tiab] OR "statistics and numerical data"[sh] OR "epidemiology"[sh])

AND

(Doctor[ti] OR Doctors[ti] OR Physician[ti] OR Physicians[ti] OR Clinician[ti] OR Clinicians[ti] OR "General practitioner"[ti] OR "General practitioners"[ti] OR Cardiologist[ti] OR Cardiologists[ti] OR Dermatologist[ti] OR Dermatologists[ti] OR Endocrinologist[ti] OR Endocrinologists[ti] OR Gastroenterologist[ti] OR Gastroenterologists[ti] OR Geriatrician[ti] OR Geriatricians[ti] OR Neurologist[ti] OR Neurologists[ti] OR Oncologist[ti] OR Oncologists[ti] OR Obstetrician[ti] OR Obstetricians[ti] OR Pediatrician[ti] OR Pediatricians[ti] OR Paediatrician[ti] OR Paediatricians[ti] OR Psychiatrist[ti] OR Psychiatrists[ti] OR "Family Physician"[ti] OR "Family Physicians"[ti] OR Surgeon[ti] OR Surgeons[ti] OR Urologist[ti] OR Urologists[ti] OR Psychiatrist[ti] OR Psychiatrists[ti] OR Resident[ti] OR Residents[ti] OR Registrar[ti] OR Registrars[ti] OR Consultant[ti] OR Consultants[ti] OR Specialist[ti] OR Specialists[ti] OR Individual[ti] OR Individuals[ti] OR Variability[ti] OR Variation[ti] OR Vary[ti] OR "Patient care"[ti] OR "Care quality"[ti] OR ((Treatment[ti] OR Medical[ti] OR Surgical[ti]) AND (Outcome[ti] OR Outcomes[ti])))

### Embase Query:

('physician'/exp OR Doctor:ti,ab OR Doctors:ti,ab OR Physician:ti,ab OR Physicians:ti,ab OR Clinician:ti,ab OR Clinicians:ti,ab OR "General practitioner":ti,ab OR "General practitioners":ti,ab OR Cardiologist:ti,ab OR Cardiologists:ti,ab OR Dermatologist:ti,ab OR

Dermatologists:ti,ab OR Endocrinologist:ti,ab OR Endocrinologists:ti,ab OR  
 Gastroenterologist:ti,ab OR Gastroenterologists:ti,ab OR Geriatrician:ti,ab OR  
 Geriatricians:ti,ab OR Neurologist:ti,ab OR Neurologists:ti,ab OR Oncologist:ti,ab OR  
 Oncologists:ti,ab OR Obstetrician:ti,ab OR Obstetricians:ti,ab OR Pediatrician:ti,ab OR  
 Pediatricians:ti,ab OR Paediatrician:ti,ab OR Paediatricians:ti,ab OR Psychiatrist:ti,ab OR  
 Psychiatrists:ti,ab OR "Family Physician":ti,ab OR "Family Physicians":ti,ab OR Surgeon:ti,ab  
 OR Surgeons:ti,ab OR Urologist:ti,ab OR Urologists:ti,ab OR Psychiatrist:ti,ab OR  
 Psychiatrists:ti,ab OR Resident:ti,ab OR Residents:ti,ab OR Registrar:ti,ab OR Registrars:ti,ab  
 OR Consultant:ti,ab OR Consultants:ti,ab OR Specialist:ti,ab OR Specialists:ti,ab)  
 AND  
 ('clinical practice'/exp OR 'Clinical Competence'/exp OR Individual:ti,ab OR Individuals:ti,ab)  
 AND  
 (Variability:ti,ab OR Variation:ti,ab OR Vary:ti,ab)  
 AND  
 ('treatment outcome'/exp OR 'health care quality'/exp OR 'Patient Care'/exp OR "Patient  
 care":ti,ab OR "Care quality":ti,ab OR ((Treatment:ti,ab OR Medical:ti,ab OR Surgical:ti,ab)  
 AND (Outcome:ti,ab OR Outcomes:ti,ab)))  
 AND  
 ('epidemiology'/exp OR 'case control study'/exp OR 'cohort analysis'/exp OR "Case  
 control":ti,ab OR Longitudinal:ti,ab OR Prospective:ti,ab OR Retrospective:ti,ab OR "Cross  
 sectional":ti,ab OR 'cross-sectional study'/exp OR Investigated:ti,ab OR Analysis:ti,ab OR  
 Data:ti,ab)  
 AND  
 (Doctor:ti OR Doctors:ti OR Physician:ti OR Physicians:ti OR Clinician:ti OR Clinicians:ti OR  
 "General practitioner":ti OR "General practitioners":ti OR Cardiologist:ti OR Cardiologists:ti  
 OR Dermatologist:ti OR Dermatologists:ti OR Endocrinologist:ti OR Endocrinologists:ti OR  
 Gastroenterologist:ti OR Gastroenterologists:ti OR Geriatrician:ti OR Geriatricians:ti OR  
 Neurologist:ti OR Neurologists:ti OR Oncologist:ti OR Oncologists:ti OR Obstetrician:ti OR  
 Obstetricians:ti OR Pediatrician:ti OR Pediatricians:ti OR Paediatrician:ti OR Paediatricians:ti  
 OR Psychiatrist:ti OR Psychiatrists:ti OR "Family Physician":ti OR "Family Physicians":ti OR  
 Surgeon:ti OR Surgeons:ti OR Urologist:ti OR Urologists:ti OR Psychiatrist:ti OR  
 Psychiatrists:ti OR Resident:ti OR Residents:ti OR Registrar:ti OR Registrars:ti OR  
 Consultant:ti OR Consultants:ti OR Specialist:ti OR Specialists:ti OR Individual:ti OR  
 Individuals:ti OR Variability:ti OR Variation:ti OR Vary:ti OR "Patient care":ti OR "Care  
 quality":ti OR ((Treatment:ti OR Medical:ti OR Surgical:ti) AND (Outcome:ti OR  
 Outcomes:ti)))

### **PsycINFO Query**

(Doctor OR Doctors OR Physician OR Physicians OR Clinician OR Clinicians OR "General  
 practitioner" OR "General practitioners" OR Cardiologist OR Cardiologists OR Dermatologist  
 OR Dermatologists OR Endocrinologist OR Endocrinologists OR Gastroenterologist OR  
 Gastroenterologists OR Geriatrician OR Geriatricians OR Neurologist OR Neurologists OR  
 Oncologist OR Oncologists OR Obstetrician OR Obstetricians OR Pediatrician OR  
 Pediatricians OR Paediatrician OR Paediatricians OR Psychiatrist OR Psychiatrists OR "Family  
 Physician" OR "Family Physicians" OR Surgeon OR Surgeons OR Urologist OR Urologists OR  
 Psychiatrist OR Psychiatrists OR Resident OR Residents OR Registrar OR Registrars OR  
 Consultant OR Consultants OR Specialist OR Specialists).ti,ab  
 AND  
 ("Practice Patterns" OR "Clinical Competence" OR Individual OR Individuals).ti,ab

AND

(Variability OR Variation OR Vary).ti,ab

AND

("Quality of Health Care" OR "Patient Care" OR "Patient care" OR "Care quality" OR  
((Treatment OR Medical OR Surgical) AND (Outcome OR Outcomes))).ti,ab

AND

(Epidemiologic OR case-control OR "Cohort Studies" OR "Case control" OR Longitudinal OR  
Prospective OR Retrospective OR "Cross sectional" OR "Cross-Sectional Studies" OR  
Investigated OR Analysis OR Data).ti,ab
